# Supplementary material for: Liver stiffness measurement is a potent predictor of histological fibrosis regression after hepatitis C virus clearance
Source: PubMed Central journal article supplement — Eur J Gastroenterol Hepatol. 2020 Jul 6;33(4):547–54. doi: 10.1097/MEG.0000000000001749 (PMC7908855; doi:10.1097/meg.0000000000001749), 2020-07-06
Supplement: ejgh-33-547-s001.pdf [file ejgh-33-547-s001.pdf]

Supporting Table 1 The Beijing fibrosis classification

| classification            | contents                                                                                                                                                                                                                                                                                                                          |
|---------------------------|-----------------------------------------------------------------------------------------------------------------------------------------------------------------------------------------------------------------------------------------------------------------------------------------------------------------------------------|
| Predominantly progressive | Defined as most (more than 50%) fibroseptal stroma in the LBx, showing wide/broad, loosely aggregated collagen fibers, often a mix of light and dark staining fibers upon trichrome staining, which are moderately to markedly cellular and contain, variably, inflammatory cells, macrophages, and ductular reactions            |
| Indeterminate             | Defined as an uncertain mix/balance between progressive and regressive scarring. If the examining pathologist cannot come to a conclusion as to whether progressive or regressive scarring predominates, or is tempted to go to higher magnification in order to assess the balance, the specimen is categorized as indeterminate |
| Predominately regressive  | Defined as most (more than 50%) fibroseptal stroma in the LBx, showing features of HRC, namely, thin, densely compacted stroma, largely dark upon trichrome staining, which are largely acellular                                                                                                                                 |

Hepatic repair complex (HRC): delicate perforated fibrous septa; isolated thick collagen fibers; delicate periportal fibrous spikes; hepatocytes within or splitting septa; portal tract remnants; hepatic vein remnants with prolapsed hepatocytes; aberrant parenchymal veins and minute regenerative nodules of buds

Supporting Table 2 Baseline clinical characteristics of three groups classified according to the Beijing standard

| Characteristics                | Progressive           | Indeterminate          | Regressive             | P Value |
|--------------------------------|-----------------------|------------------------|------------------------|---------|
| N (%)                          | 14                    | 9                      | 45                     |         |
| Age (years), mean              | 62.52 (54.78-65.32)   | 56.08 (54.06-64.41)    | 57.49 (55.24-62.98)    | 0.43    |
| Male gender, n (%)             | 1 (7.1)               | 4 (44.4%)              | 17 (37.8%)             | 0.72    |
| BMI (kg/m <sup>2</sup> ), mean | 27.66±2.86            | 27.16±2.67             | 26.10±3.57             | 0.28    |
| WHR, mean                      | 0.89±0.06             | 0.92±0.04              | 0.91±0.05              | 0.48    |
| Hypertension, n (%)            | 7 (50)                | 5 (55.6%)              | 22 (48.9%)             | 0.94    |
| Diabetes, n (%)                | 3 (21.4)              | 0 (0)                  | 7 (15.6%)              | 0.45    |
| Hyperlipidemia, n (%)          | 5 (35.7)              | 2 (22.2%)              | 13 (28.9%)             | 0.85    |
| Treatment method               |                       |                        |                        | 0.01    |
| PEG ± RBV                      | 0                     | 2                      | 16                     |         |
| DAA                            | 9                     | 4                      | 10                     |         |
| PR + DAA                       | 5                     | 3                      | 19                     |         |
| PLT (per nL), IQR              | 134.00 (87.75-195.75) | 146.00 (124.50-200.00) | 145.00 (116.50-185.50) | 0.58    |
| ALT (U/L), IQR                 | 52.50 (20.73-91.00)   | 48.90 (31.65-64.50)    | 60.70 (35.65-96.85)    | 0.32    |
| AST (U/L), IQR                 | 51.95 (33.65-80.85)   | 51.80 (37.90-58.00)    | 50.20 (36.15-71.60)    | 0.93    |
| ALT/AST                        | 0.99±0.41             | 1.00±0.27              | 1.23±0.36              | 0.04    |
| ALB (g/L), IQR                 | 42.30 (39.10-45.60)   | 44.40 (43.00-46.35)    | 44.20 (42.30-46.70)    | 0.17    |
| Bilirubin (μmol/L), IQR        | 17.40 (13.50-23.80)   | 14.20 (12.15-18.05)    | 17.45 (13.90-22.43)    | 0.35    |
| PT (s), IQR                    | 11.25 (10.90-11.45)   | 11.50 (11.10-11.55)    | 11.45 (10.80-12.30)    | 0.74    |
| INR, IQR                       | 1.00 (0.97-1.02)      | 1.03 (0.99-1.10)       | 1.04 (0.97-1.11)       | 0.58    |
| HCV genotype                   |                       |                        |                        | 0.88    |
| 1b                             | 11                    | 7                      | 33                     |         |
| 2a                             | 1                     | 0                      | 6                      |         |
| Untyped                        | 2                     | 2                      | 6                      |         |
| LSM, kPa, IQR                  | 14.35 (11.33-27.33)   | 13.40(10.35-22.25)     | 10.65 (8.10-12.93)     | 0.01    |
| CAP (dB/m), mean               | 259.00±55.39          | 241.13±28.31           | 235.09±41.32           | 0.39    |
| APRI, IQR                      | 0.98 (0.74-2.42)      | 0.91 (0.51-1.29)       | 0.99 (0.63-1.71)       | 0.71    |
| FIB-4, IQR                     | 3.51 (2.55-5.63)      | 2.51 (1.96-3.76)       | 2.68 (1.86-3.67)       | 0.21    |

Supporting Table 3 Predictors of fibrosis regression by univariate and multivariate logistic regression analysis

| Baseline variables                | Univariate analysis |      |         | Multivariate analysis |      |         |
|-----------------------------------|---------------------|------|---------|-----------------------|------|---------|
|                                   | $\beta$             | SE   | P Value | $\beta$               | SE   | P Value |
| Age                               | -0.08               | 0.05 | 0.14    |                       |      |         |
| Male gender                       | -2.11               | 1.08 | 0.05    |                       |      |         |
| BMI                               | -0.12               | 0.09 | 0.18    |                       |      |         |
| Hypertension                      | 0.00                | 0.60 | 1.00    |                       |      |         |
| Diabetes                          | -0.61               | 0.77 | 0.62    |                       |      |         |
| Hyperlipidemia                    | -0.37               | 0.64 | 0.56    |                       |      |         |
| HCV genotype 1b versus 2a         | 0.00                | 0.67 | 1.00    |                       |      |         |
| IFN-free versus IFN-based therapy | -0.85               | 0.45 | 0.06    |                       |      |         |
| Platelet                          | 0.01                | 0.01 | 0.33    |                       |      |         |
| ALT                               | 0.01                | 0.01 | 0.44    |                       |      |         |
| AST                               | 0.00                | 0.01 | 0.86    |                       |      |         |
| ALT/AST                           | 1.99                | 1.08 | 0.07    |                       |      |         |
| ALB                               | 0.17                | 0.10 | 0.11    |                       |      |         |
| Bilirubin                         | 0.01                | 0.04 | 0.89    |                       |      |         |
| LSM                               | -0.13               | 0.05 | 0.01    | -0.19                 | 0.07 | 0.00    |
| CAP                               | -0.01               | 0.01 | 0.13    |                       |      |         |
| $\Delta$ LSM                      | 1.52                | 0.82 | 0.06    | 3.04                  | 1.32 | 0.02    |
| $\Delta$ FIB-4                    | 0.99                | 0.67 | 0.14    |                       |      |         |
| $\Delta$ APRI                     | 0.82                | 0.62 | 0.19    |                       |      |         |

Supporting Table 4 A decrease in noninvasive fibrosis indicators cannot predict the pathological recovery of liver fibrosis

| Characteristics                                      | Progressive<br>N=14 | Nonprogressive<br>N=54 | P Value |
|------------------------------------------------------|---------------------|------------------------|---------|
| LSM baseline - LSM puncture kPa, mean                | 2.57±9.34           | 4.06±4.09              | 0.58    |
| (LSM baseline - LSM puncture)/LSM baseline IQR       | 0.20 (0.04-0.41)    | 0.32 (0.15-0.46)       | 0.42    |
| FIB-4 baseline - FIB-4 puncture IQR                  | 0.92 (0.12-1.78)    | 0.77 (0.14-1.77)       | 0.91    |
| (FIB-4 baseline - FIB-4 puncture)/FIB-4 baseline IQR | 0.23 (0.02-0.47)    | 0.27 (0.09-0.47)       | 0.68    |
| APRI baseline - APRI puncture IQR                    | 0.53 (0.34-0.67)    | 0.53 (0.23-1.01)       | 0.86    |
| (APRI baseline - APRI puncture)/APRI baseline IQR    | 0.51 (0.42-0.68)    | 0.59 (0.41-0.75)       | 0.47    |
